# Supplementary material for: Reduced vacuolar ATPase protects mice from Friend virus infection – an unintended but instructive effect in Hif-2afl mice
Source: J Cell Sci. 2024 Jun 28;137(12):jcs261893. doi: 10.1242/jcs.261893 (PMC11234382; doi:10.1242/jcs.261893)
Supplement: Supplementary information [file joces-137-261893-s1.pdf]

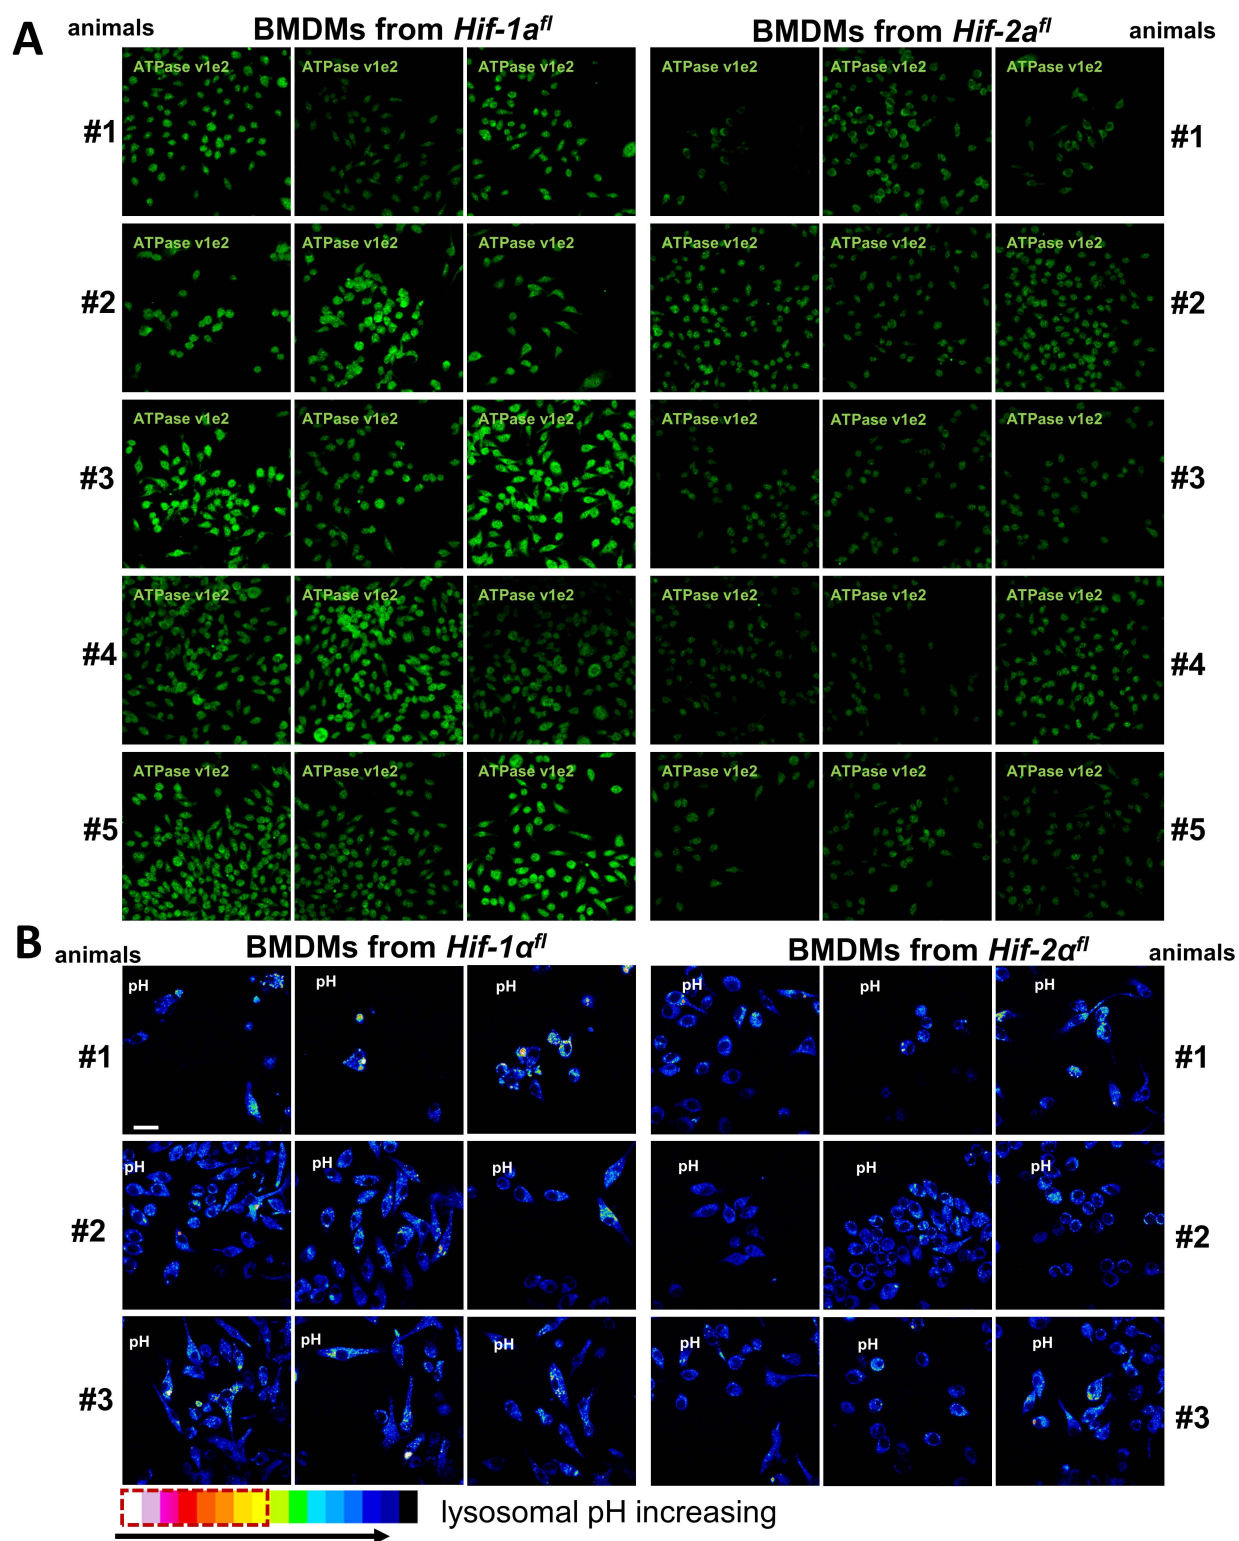

**Fig. S1. BMDMs from *Hif-2a<sup>fl</sup>* mice show a reduced expression of the V-ATPase subunit E2 and show a reduced acidification of lysosomes.** Representative images of all BMDMs from all analyzed individuals leading to the analysis shown in Figure 5 (B, D). **(A):** The V-ATPase subunit E2 was immunocytochemically stained in BMDMs from *Hif-1a<sup>fl</sup>* and *Hif-2a<sup>fl</sup>* mice: 3 representative images of 5 independent mice with floxed *Hif1a* or *Hif2a* were analyzed; scale bar: 40  $\mu$ m. **(B):** The lysosomal pH has been examined with LysoSensor<sup>TM</sup> with increasing yellow to white coloring (see red dotted box) indicating a lower lysosomal pH. 3 representative images of each 3 independent mice with floxed *Hif1a* and *Hif2a* were analyzed; scale bar: 20  $\mu$ m.

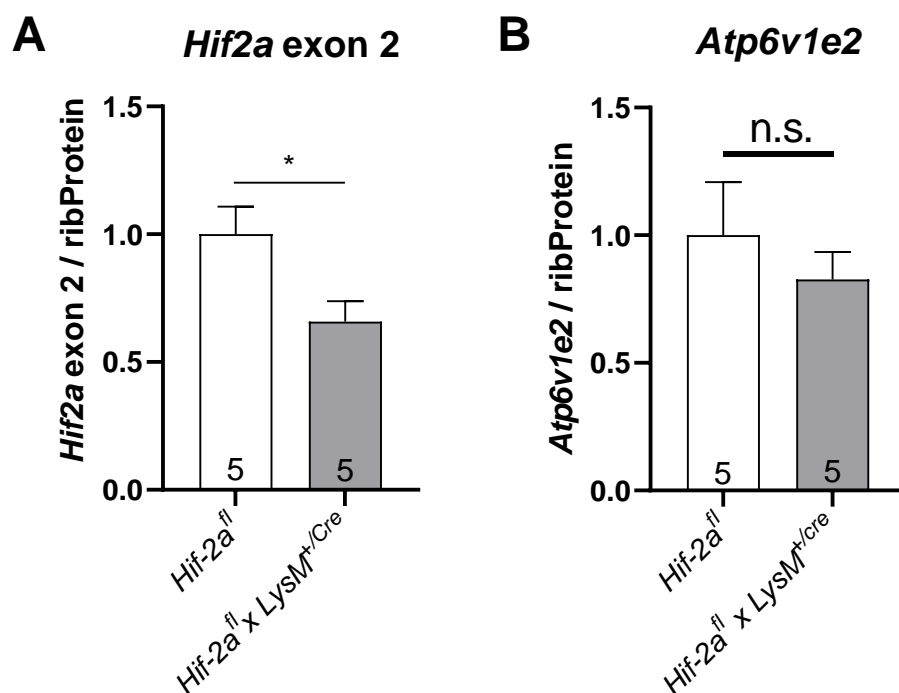

**Fig. S2. Knockout of *Hif2a* does not affect the expression of *Atp6v1e2*.**

To determine whether loss of functional HIF-2 $\alpha$  alters *Atp6v1e2* expression, we performed mRNA expression analyses of BMDMs from *Hif-2a<sup>fl</sup>* and *Hif-2a<sup>fl</sup> x LysM<sup>+/cre</sup>* mice. Analysis of the expression of exon2 of the *Hif2a* mRNA confirmed a significant downregulation in the BMDM culture of *Hif-2a<sup>fl</sup> x LysM<sup>+/cre</sup>* mice (A) whereas the *Atp6v1e2* expression did not differ between the two mouse strains (p=0.4667). Data were analyzed by Student's t test (mean  $\pm$  SEM). The numbers in the graphs indicate the numbers of animals tested. Analysis was performed in triplicates for each mouse. \* *p*-value < 0.05; ns = not significant.

|                                          |                   | Protein coding region / translated region                                                                         |  |
|------------------------------------------|-------------------|-------------------------------------------------------------------------------------------------------------------|--|
| HIF1a <sup>fl</sup> xHIF2a <sup>fl</sup> | <b>ATP6v1e2</b>   |                                                                                                                   |  |
|                                          | original sequence | 3516 TTCTGAGAGCAGCCATGGCCCTGACTGACATAGACGTGCAGAAAGCAGATCAAGCACATGATGGCGTTTCATCGAGCAGGAAGCCACGAGAAAGCGGAGGA 3615   |  |
|                                          | sample sequence   | 1 TTCTGAGAGCAGCCATGGCCCTGACTGACATAGACGTGCAGAAAGCAGATCAAGCACATGATGGCGTTTCATCGAGCAGGAAGCCACGAGAAAGCGGAGGA 100       |  |
|                                          | original sequence | 3616 GATAGACGCCAAGGCGGAGGAAGATTCAACATTGAGAAAGGCCGCTGGTGACAGCCAGCGGCTGAAGATCATGGATTATTTTGAGAAAGAGGAGAA 3715        |  |
|                                          | sample sequence   | 101 GATAGACGCCAAGGCGGAGGAAGATTCAACATTGAGAAAGGCCGCTGGTGACAGCCAGCGGCTGAAGATCATGGATTATTTTGAGAAAGAGGAGAA 200          |  |
|                                          | original sequence | 3716 CAGATTGAGCAGCAGAAAAAGATCCAGCTGTCCACCATGAGAAACAGGCTCGCATCACGGTCCTGAGAGCCGAGACAATCTCATCTTAGAATTGCTCA 3815      |  |
|                                          | sample sequence   | 201 CAGATTGAGCAGCAGAAAAAGATCCAGCTGTCCACCATGAGAAACAGGCTCGCATCACGGTCCTGAGAGCCGAGACAATCTCATCTTAGAATTGCTCA 300        |  |
|                                          | original sequence | 3816 AGGATGCCAAGATGAGGCTCAGCAGAAATTGTGTCGGATGAAGAAATCTACCAAGGACCTGCTGGATAAGCTCGTGCTCCAAGCCTTGCTCCGGCTGCTGGA 3915  |  |
|                                          | sample sequence   | 301 AGGATGCCAAGATGAGGCTCAGCAGAAATTGTGTCGGATGAAGAAATCTACCAAGGACCTGCTGGATAAGCTCGTGCTCCAAGCCTTGCTCCGGCTGCTGGA 400    |  |
| HIF1a <sup>fl</sup>                      | original sequence | 3916 GCCTGTGATGATTGTCCGCTGCCGGCCACAGGACCTCCACCTGGTGGAGTCTCGGGTCTAAGAGCCATCCCTCAGTACATGAGGCTCTGCCAGAAAGCAT 4015    |  |
|                                          | sample sequence   | 401 GCCTGTGATGATTGTCCGCTGCCGGCCACAGGACCTCCACCTGGTGGAGTCTCGGGTCTAAGAGCCATCCCTCAGTACATGAGGCTCTGCCAGAAAGCAT 500      |  |
|                                          | original sequence | 4016 TTGGAGGTACAGTTGACCAAACTGAACACTTGCCCTTCCAATGCTGCTGGAGGGGTGGAGGTCTACAGCAGCGATCAGAAAAATAAGGTTTCCAACACC 4115     |  |
|                                          | sample sequence   | 501 TTGGAGGTACAGTTGACCAAACTGAACACTTGCCCTTCCAATGCTGCTGGAGGGGTGGAGGTCTACAGCAGCGATCAGAAAAATAAGGTTTCCAACACC 600       |  |
|                                          | original sequence | 4116 TGGAAAGTCGGCTGAATCTCGCGGCCATGCAGAAAGATGCCAGAAATACGAGGGATTCTGTTTGGAGACAACACACAGCAGAAAGTTCTTTACATGAGGCTC 4215  |  |
|                                          | sample sequence   | 601 TGGAAAGTCGGCTGAATCTCGCGGCCATGCAGAAAGATGCCAGAAATACGAGGGATTCTGTTTGGAGACAACACACAGCAGAAAGTTCTTTACATGAGGCTC 700    |  |
|                                          | original sequence | 4216 TGGGACAGGGAGCCTGGGCTAAACTGCAAG - AGCCTTCAA 4254                                                              |  |
|                                          | sample sequence   | 701 TGGGACAGGGAGCCTGGGCTAAACTGCAAGAGCCTTCAA 740                                                                   |  |
| HIF1a <sup>fl</sup>                      | original sequence | 3515 TTTCTGAGAGCAGCCATGGCCCTGACTGACATAGACGTGCAGAAAGCAGATCAAGCACATGATGGCGTTTCATCGAGCAGGAAGCCACGAGAAAGCGGAGGA 3614  |  |
|                                          | sample sequence   | 2 TTTCTGAGAGCAGCCATGGCCCTGACTGACATAGACGTGCAGAAAGCAGATCAAGCACATGATGGCGTTTCATCGAGCAGGAAGCCACGAGAAAGCGGAGGA 101      |  |
|                                          | original sequence | 3615 AGATAGACGCCAAGGCGGAGGAAGATTCAACATTGAGAAAGGCCGCTGGTGACAGCCAGCGGCTGAAGATCATGGATTATTTTGAGAAAGAGGAGAA 3714       |  |
|                                          | sample sequence   | 102 AGATAGACGCCAAGGCGGAGGAAGATTCAACATTGAGAAAGGCCGCTGGTGACAGCCAGCGGCTGAAGATCATGGATTATTTTGAGAAAGAGGAGAA 201         |  |
|                                          | original sequence | 3715 ACAGATTGAGCAGCAGAAAAAGATCCAGCTGTCCACCATGAGAAACAGGCTCGCATCACGGTCCTGAGAGCCGAGACAATCTCATCTTAGAATTGCTC 3814      |  |
|                                          | sample sequence   | 202 ACAGATTGAGCAGCAGAAAAAGATCCAGCTGTCCACCATGAGAAACAGGCTCGCATCACGGTCCTGAGAGCCGAGACAATCTCATCTTAGAATTGCTC 301        |  |
|                                          | original sequence | 3815 AAGGATGCCAAGATGAGGCTCAGCAGAAATTGTGTCGGATGAAGAAATCTACCAAGGACCTGCTGGATAAGCTCGTGCTCCAAGCCTTGCTCCGGCTGCTGGA 3914 |  |
|                                          | sample sequence   | 302 AAGGATGCCAAGATGAGGCTCAGCAGAAATTGTGTCGGATGAAGAAATCTACCAAGGACCTGCTGGATAAGCTCGTGCTCCAAGCCTTGCTCCGGCTGCTGGA 401   |  |
| HIF1a <sup>fl</sup>                      | original sequence | 3915 AGCCTGTGATGATTGTCCGCTGCCGGCCACAGGACCTCCACCTGGTGGAGTCTCGGGTCTAAGAGCCATCCCTCAGTACATGAGGCTCTGCCAGAAAGCA 4014    |  |
|                                          | sample sequence   | 402 AGCCTGTGATGATTGTCCGCTGCCGGCCACAGGACCTCCACCTGGTGGAGTCTCGGGTCTAAGAGCCATCCCTCAGTACATGAGGCTCTGCCAGAAAGCA 501      |  |
|                                          | original sequence | 4015 TTTGGAGGTACAGTTGACCAAACTGAACACTTGCCCTTCCAATGCTGCTGGAGGGGTGGAGGTCTACAGCAGCGATCAGAAAAATAAGGTTTCCAACACC 4114    |  |
|                                          | sample sequence   | 502 TTTGGAGGTACAGTTGACCAAACTGAACACTTGCCCTTCCAATGCTGCTGGAGGGGTGGAGGTCTACAGCAGCGATCAGAAAAATAAGGTTTCCAACACC 601      |  |
|                                          | original sequence | 4115 CTGGAAGTCGGCTGAATCTCGCGGCCATGCAGAAAGATGCCAGAAATACGAGGGATTCTGTTTGGAGACAACACACAGCAGAAAGTTCTTTACATGAGGCT 4214   |  |
|                                          | sample sequence   | 602 CTGGAAGTCGGCTGAATCTCGCGGCCATGCAGAAAGATGCCAGAAATACGAGGGATTCTGTTTGGAGACAACACACAGCAGAAAGTTCTTTACATGAGGCT 701     |  |
|                                          | original sequence | 4215 CTGGGACAGGGAGCCTGGGCTAAACTGCAAG - AGCCTTCAA 4253                                                             |  |
|                                          | sample sequence   | 702 CTGGGACAGGGAGCCTGGGCTAAACTGCAAGAGCCTTCAA 741                                                                  |  |

**Fig. S3. The protein coding region of the *Atp6v1e2* gene is not altered in *Hif-1a<sup>fl</sup>* or *Hif-1a<sup>fl</sup> x Hif-2a<sup>fl</sup>* mice.**

Genomic DNA has been extracted from *Hif-1a<sup>fl</sup>* and *Hif-1a<sup>fl</sup> x Hif-2a<sup>fl</sup>* mice (which behave like *Hif-2a<sup>fl</sup>* with respect to FV infection, see Figure 1B) and the complete protein coding sequence of the *Atp6v1e2* gene has been sequenced. Sequence alignment of the coding region of the *Atp6v1e2* gene revealed no differences neither in *Hif-1a<sup>fl</sup>* nor in *Hif-1a<sup>fl</sup> x Hif-2a<sup>fl</sup>* mice compared to the original sequence (n=3 for both mouse strains).

# Localisation of *ATP6v1e2* and *EPAS1*

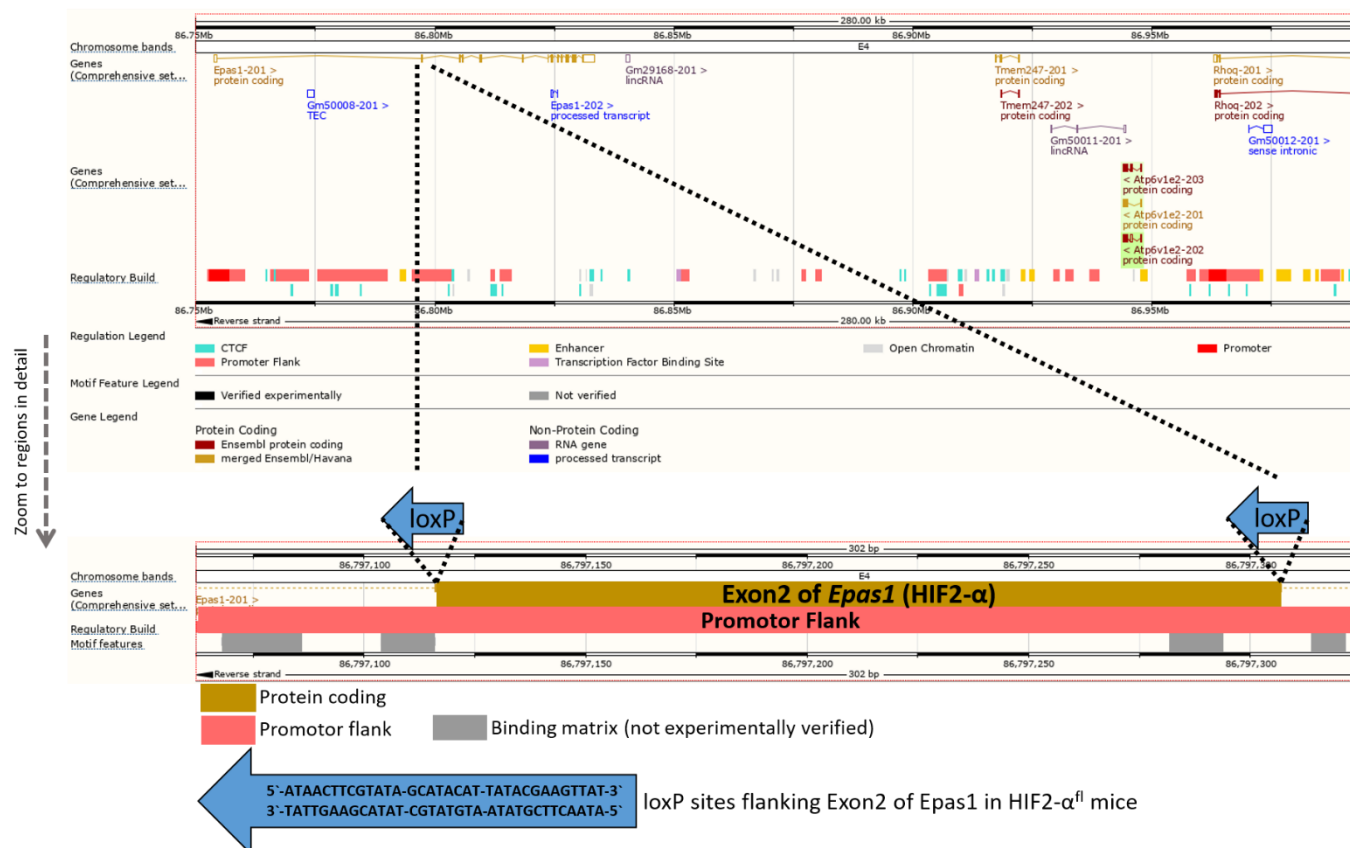

**Fig. S4. Localization of the *Hif2a* and the *Atp6v1e2* gene.** *Hif2a* and *Atp6v1e2* localize on chromosome 17 of the mouse. Although the loxP sites of the *Hif-2a<sup>f</sup>* mice locate in a region that is referred to as promotor flank region it is unlikely to affect the expression of the *Atp6v1e2* gene directly as the distance to the transcription start site of this gene is about 147 kilo bases. Nonetheless, the non-translated regions around exon 2 might carry indirect roles e.g. as an enhancer of transcription. The figure has been adapted from [http://www.ensembl.org/Mus\\_musculus/Location/View?db=core;fdb=funcgen;g=ENSMUSG00000053375;r=17:86797062-86797363;rf=ENSMUSR00000128957;t=ENSMUST00000233995](http://www.ensembl.org/Mus_musculus/Location/View?db=core;fdb=funcgen;g=ENSMUSG00000053375;r=17:86797062-86797363;rf=ENSMUSR00000128957;t=ENSMUST00000233995).

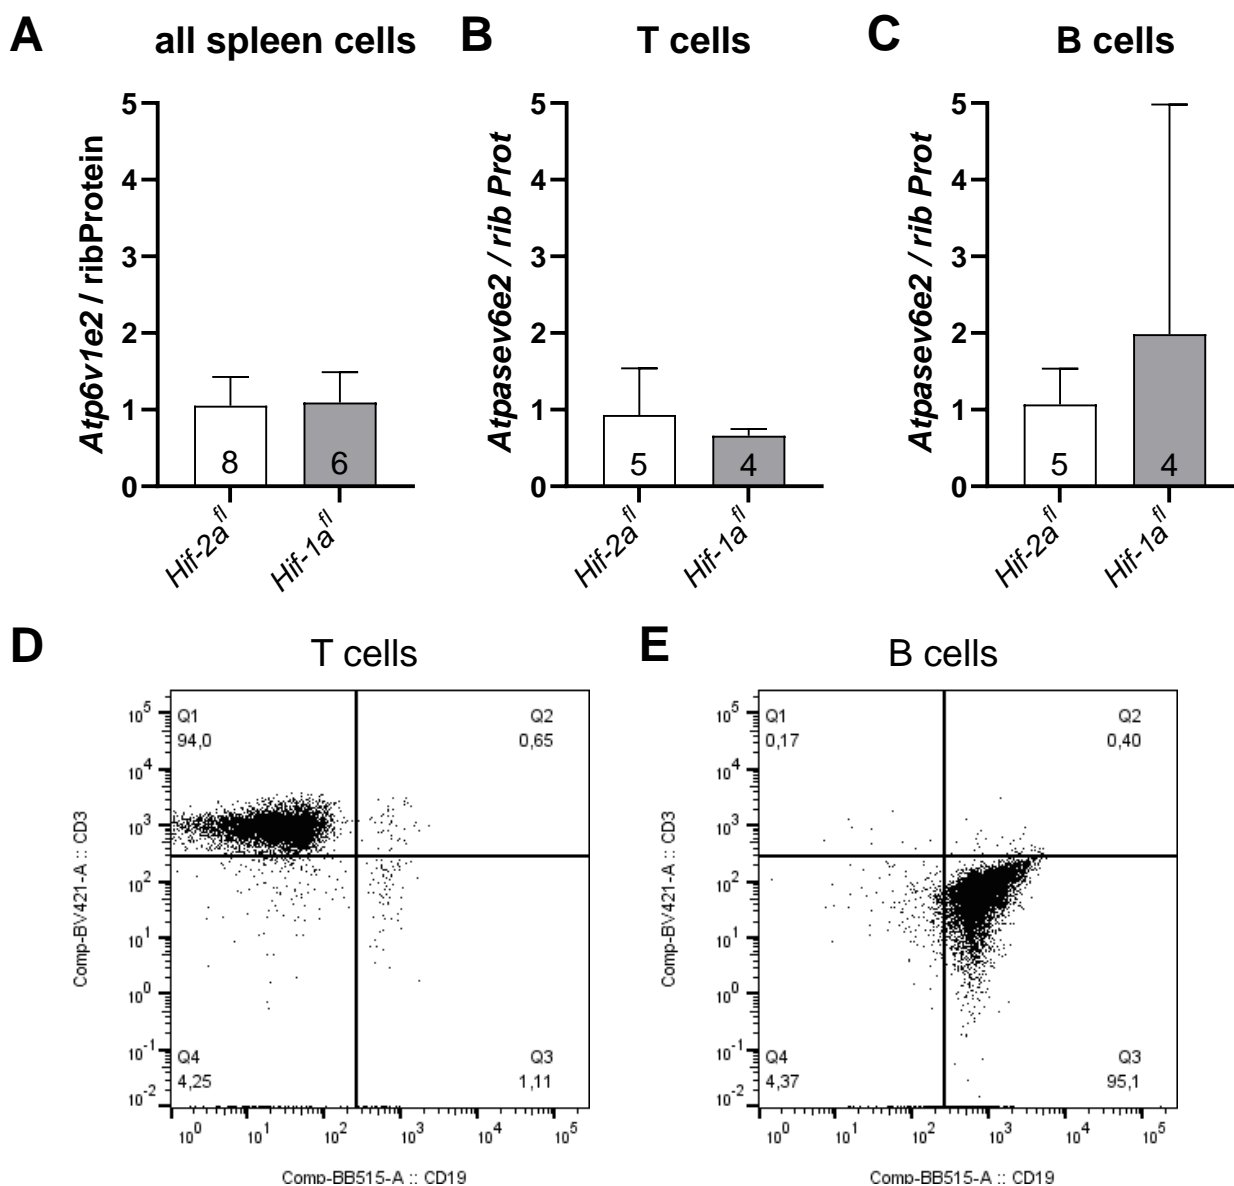

**Fig. S5. The expression of *Atp6v1e2* is unaltered in total spleen cell lysates as well as in T and B cells isolated from mouse spleens.**

To determine whether mRNA expression of *Atp6v1e2* is changed in other cells than in macrophages, we performed mRNA expression analyses of (A) all cells of mouse spleens, (B) MACS-enriched T cells and (C) MACS-enriched B cells from *Hif-2a<sup>fl</sup>* and *Hif-1a<sup>fl</sup>* mice. Analysis of the expression of the *Atp6v1e2* mRNA confirmed no differences between the two groups (mean  $\pm$  SD). The numbers in the graphs indicate the numbers of animals tested. Analysis was performed in triplicates for each mouse. The purity of the enriched T and B cells was analyzed via flow cytometry and reached >90%; shown are representative dot plots (D, E).

**Table S1. Mouse strain labeling and characterization**

| Mouse strain labeling                              | Phenotype | Knockout  |
|----------------------------------------------------|-----------|-----------|
| <i>Hif-1a<sup>fl</sup></i>                         | wild type | -         |
| <i>Hif-1a<sup>fl</sup> × LysM<sup>+/cre</sup></i>  | knockout  | myeloid   |
| <i>Hif-2a<sup>fl</sup></i>                         | wild type | -         |
| <i>Hif-2a<sup>fl</sup> × LysM<sup>+/+</sup></i>    | wild type | -         |
| <i>Hif-2a<sup>fl</sup> × LysM<sup>+/cre</sup></i>  | knockout  | myeloid   |
| <i>Hif-2a<sup>fl</sup> × CD11c<sup>+/cre</sup></i> | knockout  | dendritic |
| <i>Hif-1a<sup>fl</sup> × Hif-2a<sup>fl</sup></i>   | wild type | -         |
| <i>FVB: Hif-1a<sup>fl</sup></i>                    | wild type | -         |
